# Supplementary material
Source: publisher figshare collection journal article supplement (https://acs.figshare.com/ndownloader/files/5456171)
Supplement: Supplementary file 1 [file 5456171]

## **Supporting Information**

# Aggregation and Rheology of an Azobenzene Functionalized Hydrophobically Modified Ethoxylated Urethane in Aqueous Solution

*Zhukang Du, Biye Ren\*, Xueyi Chang, Renfeng Dong, Jun Peng, and Zhen Tong*

School of Materials Science and Engineering, South China University of Technology,  
Guangzhou 510641, China

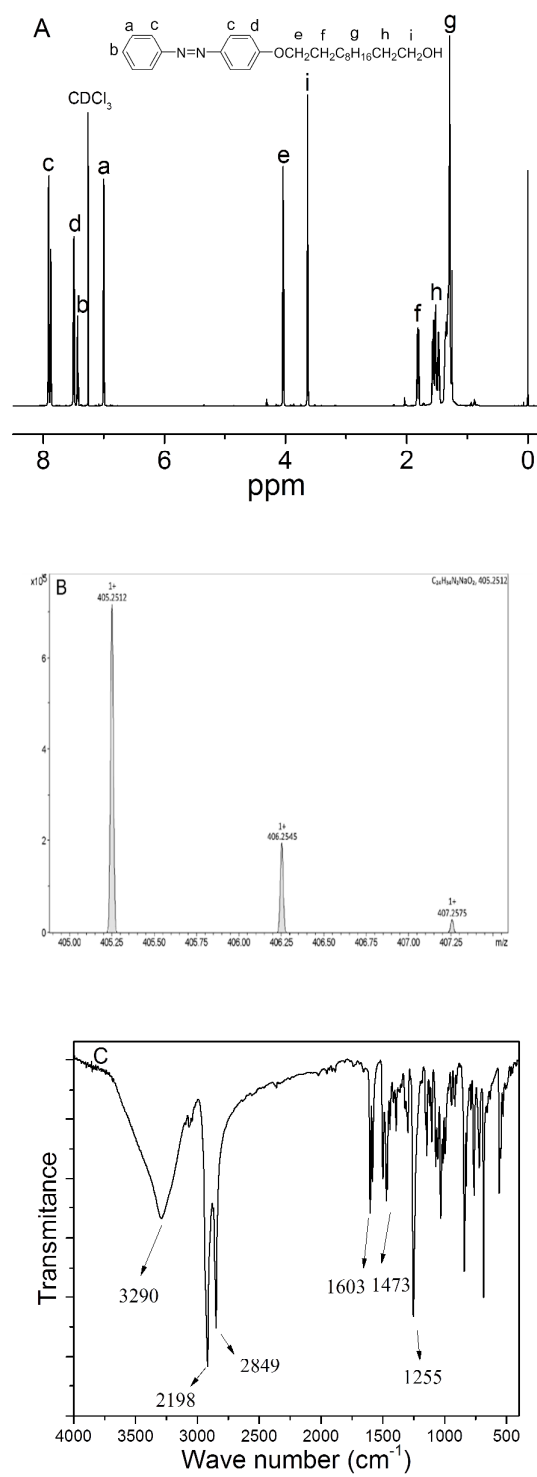

**Figure S1.** (A) <sup>1</sup>H NMR spectrum of **AzoC<sub>12</sub>OH** end capper. (B) Mass spectrometry of **AzoC<sub>12</sub>OH** end capper. (C) FTIR spectrum of **AzoC<sub>12</sub>OH** end capper.

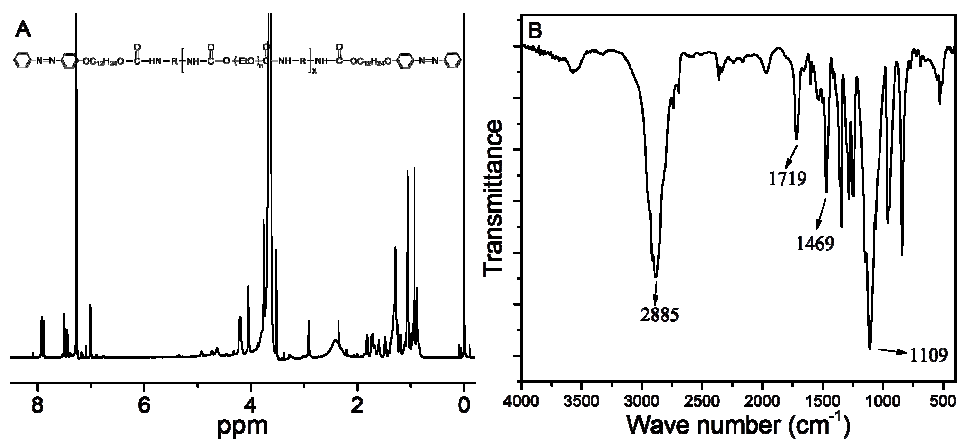

Figure S2. (A)  $^1\text{H}$  NMR spectrum of AzoHEUR polymer. (B) FTIR spectrum of AzoHEUR polymer.

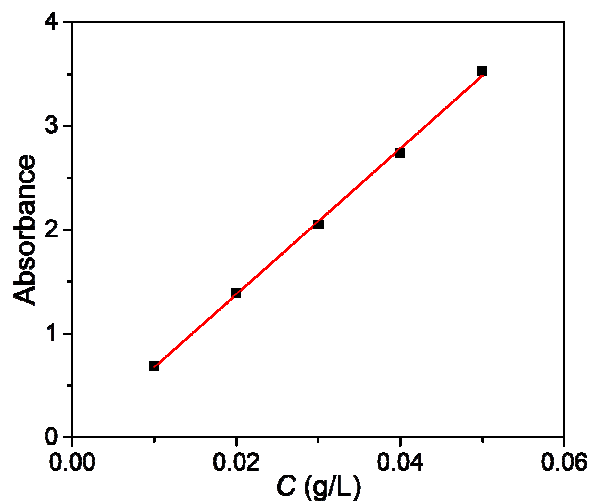

Figure S3. The standard curve obtained from the maximum absorbance of azo end capper with different concentration in 340 nm.

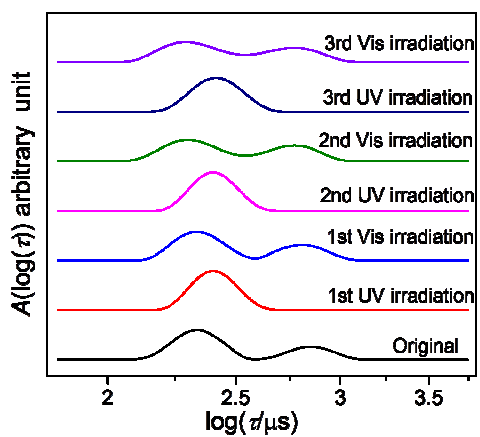

Figure S4. DLS results for 3.0 wt % *trans*- and *cis*-AzoHEUR solutions.

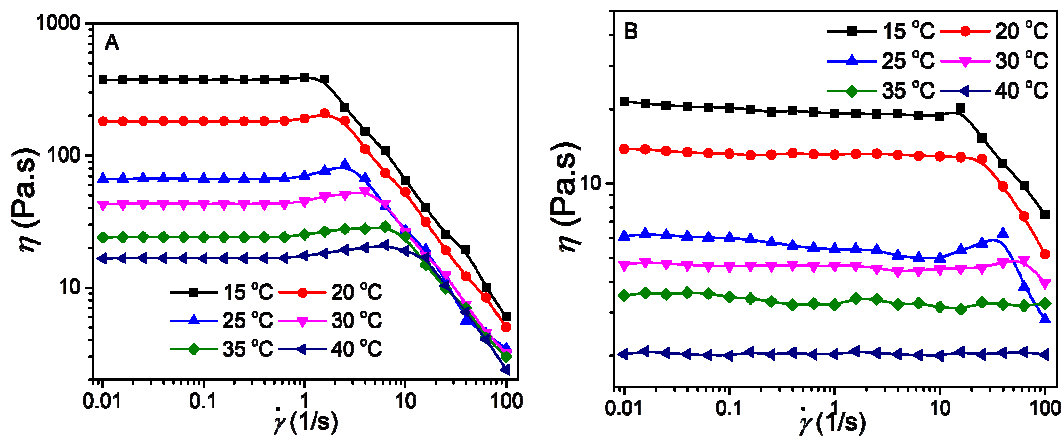

**Figure S5.** Plots of steady shear viscosity  $\eta$  vs shear rate  $\dot{\gamma}$  for 3.0 wt % AzoHEUR aqueous solution at different temperature: (A) *trans*-form, (B) *cis*-form.

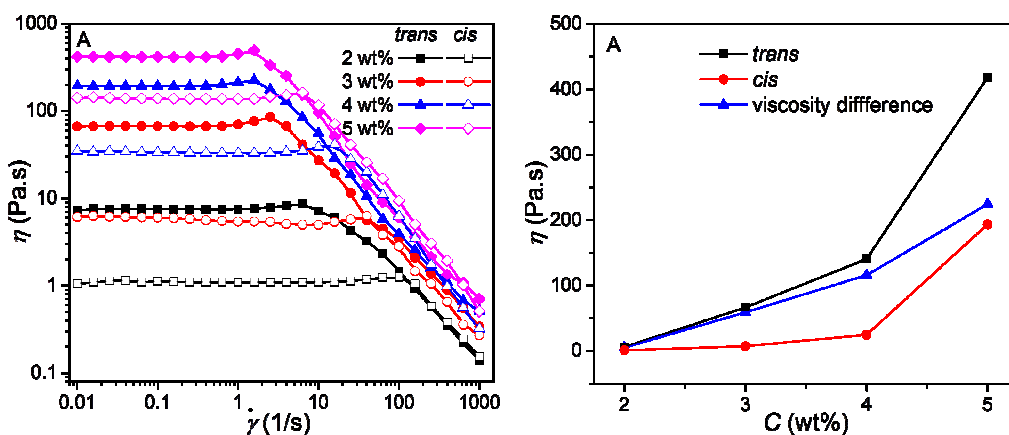

**Figure S6.** (A) Steady shear viscosity  $\eta$  vs shear rate  $\dot{\gamma}$  for difference concentration of *trans*- and *cis*-form AzoHEUR aqueous solutions (B) Zero-shear viscosity  $\eta_0$  and viscosity difference as a function of AzoHEUR concentration  $C$ .

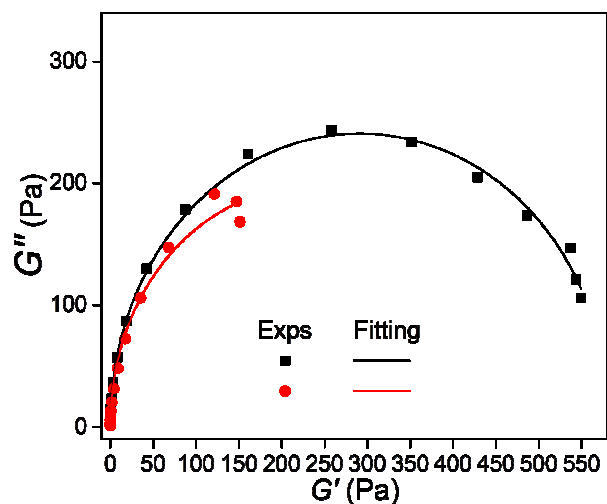

**Figure S7.** Cole-Cole plots for the 3.0 wt % *trans* and *cis*-AzoHEUR aqueous solution at 25 °C.
